# Supplementary material for: A high-spin s -triazine linked fluorenyl radical polymer
Source: Royal Society of Chemistry journal article supplement (doi:10.1039/d4ra03034f), 2024-01-01
Supplement: d4ra03034f1.pdf [file d4ra03034f1.pdf]

## Supporting Information

### A High-spin s-Triazine Linked Fluorenyl Radical Polymer

Hoa Phan,<sup>\*,a</sup> Tun Seng Herng,<sup>b</sup> Hou Xudong,<sup>c</sup> Linh Khanh Nguyen,<sup>a</sup> Luat Dai Tran,<sup>a</sup> Vinh The La,<sup>a</sup> Chinh Dang Huynh,<sup>a</sup> Jun Ding,<sup>b</sup> Jishan Wu<sup>\*,c</sup>

---

<sup>a</sup> School of Chemistry and Life Science, Hanoi University of Science and Technology, Hanoi, Vietnam.

Email: [hoa.phanvan@hust.edu.vn](mailto:hoa.phanvan@hust.edu.vn)

<sup>b</sup> Department of Materials Science and Engineering, National University of Singapore, 119260 Singapore (Singapore)

<sup>c</sup> Department of Chemistry, National University of Singapore, 3 Science Drive 3, 117543 Singapore (Singapore).

Email: [chmwuj@nus.edu.sg](mailto:chmwuj@nus.edu.sg)

**ABSTRACT:** Syntheses of high-spin organic polymers have been a daunting task due to the highly reactive nature of organic radicals, especially when they are ferromagnetically coupled. In this paper, we report our approach to obtain high-spin organic polymers, in which reasonably stable fluorenyl radical was employed as the primary radical unit, and s-triazine serves as the connector that facilitates ferromagnetically coupling between them. The diamagnetic polymer precursor was synthesized by cyclotrimerization of a cyano-monomer, and the high-spin polymers were obtained by oxidizing corresponding anionic polymers using O<sub>2</sub> (**6**) or I<sub>2</sub> (**7**). The temperature-dependent magnetic moments, and field-dependent magnetization data obtained from SQUID measurements suggested ferromagnetic couplings between primary radical units with coupling  $J = 7.5 \text{ cm}^{-1}$  and  $38.6 \text{ cm}^{-1}$ , and the percentage of primary unit in the radical form are 29%, and 47% for **6** and **7**, respectively. This is the first time a high-spin ferromagnetically coupled fluorenyl radical polymer has ever been reported.

## Table of Contents

|                                                                                                                                  |   |
|----------------------------------------------------------------------------------------------------------------------------------|---|
| 1. General Experiment Section.....                                                                                               | 3 |
| 2. Figure S2. <sup>1</sup> H NMR spectrum of <b>1</b> .....                                                                      | 4 |
| 3. Figure S2. <sup>1</sup> H NMR spectrum (top) and MALDI-TOF (bottom) (the inset: zoom in at molecular peaks) of <b>2</b> ..... | 5 |
| 4. Figure S3. <sup>1</sup> H NMR spectrum (top) and MALDI-TOF (bottom) (the inset: zoom in at molecular peaks) of <b>3</b> ..... | 6 |
| 5. DFT calculations.....                                                                                                         | 7 |

## General Experimental Procedures

**Magnetic measurements.** ESR spectra of the as-formed solid samples were recorded on a X-band spectrometer (9.5 GHz), JES-FA100 (JEOL) with a microwave power of 1 mW, a field modulation frequency of 100 kHz, and a modulation amplitude of 0.4 G. A Quantum Design 7 Tesla SQUID VSM system was available for the magnetic susceptibility measurements in this work. Powder sample with a weight of 5-10 mg was sealed in a plastic capsule. The magnetic susceptibility was measured in the temperature range of 2 to 30 K with an applied field of 10 Oe, or 1000 Oe. Field dependent magnetization was obtained at 2K (0 - 5 T), 10 K, 100 K, 200 K, 300 K (0 - 2 T). Then, the data were corrected diamagnetic contribution from sample holders and sample themselves using tabulated constants. The high-temperature part of the temperature-dependent  $1/\chi_{\text{unit}}$  of the sample **6, 7** was fitted by using Curie-Weiss law:

$$\frac{1}{\chi_{\text{unit}}} = \frac{T - \theta}{C}$$

where  $C$  is the Curie constant and  $\theta$  is the Weiss constant:

$$\theta = \frac{2zJS(S + 1)}{3k_B}$$

where  $z$  is the number of nearest neighbors around each radical anion,  $z = 3$  for this case.

M(H) at 2 K for both samples **2** and **3** were fitted using Brillouin function:

$$M = g[J + 0.5] \coth\left(\frac{J+0.5}{J}x\right) - \frac{1}{2} \coth\left(\frac{x}{2J}\right)$$

Where  $x = g\mu_B/k_B T$ ,  $J$  is the total angular momentum number,  $g$  is the  $g$ -factor,  $\mu_B$  is the Bohr magneton and  $k_B$  is the Boltzmann constant.

**X-ray photoelectron spectroscopy measurements.** XPS measurements were performed on a VG Scienta-R400 spectrometer using a Mg K $\alpha$  X-ray (1253.6 eV) source. A conductive Cu tape was attached to holder and the sample powder was pressed on the Cu tape to form a thin organic layer. All photoemission spectra were collected at emission angle of 90° with respect to the sample surface, and operated in an ultrahigh vacuum (UHV) chamber with a base pressure of  $1 \times 10^{-9}$  mbar.

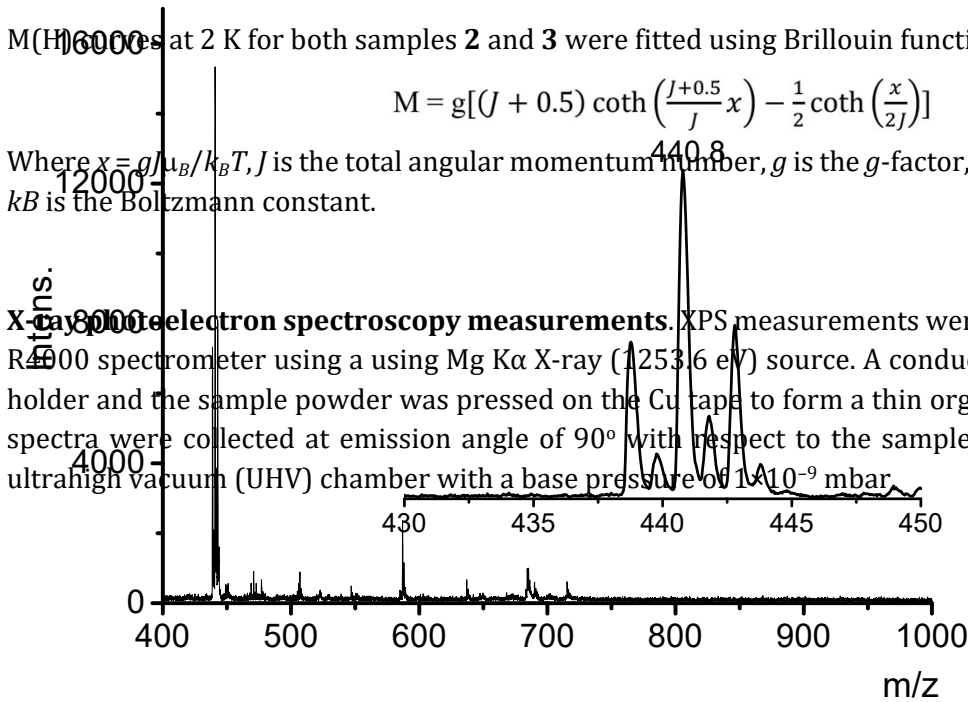

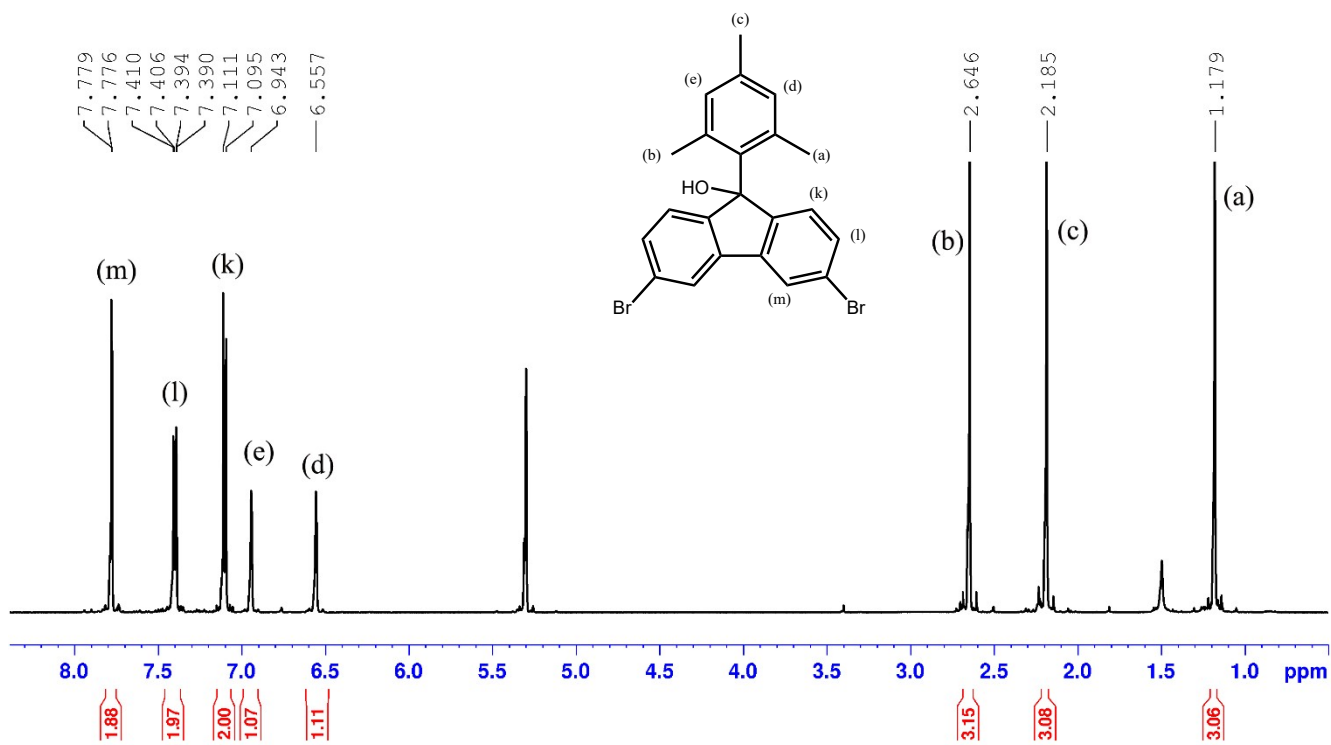

**Figure S1.** <sup>1</sup>H NMR spectrum of **1**

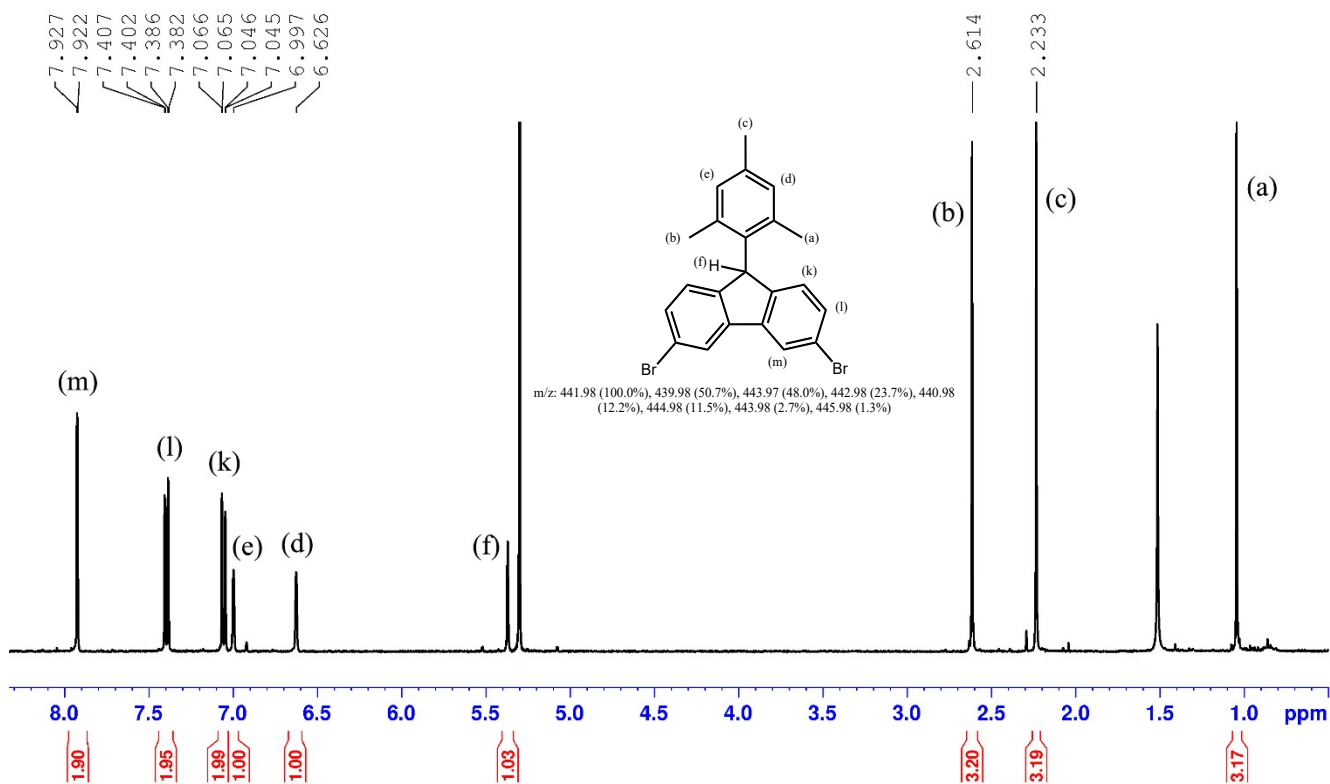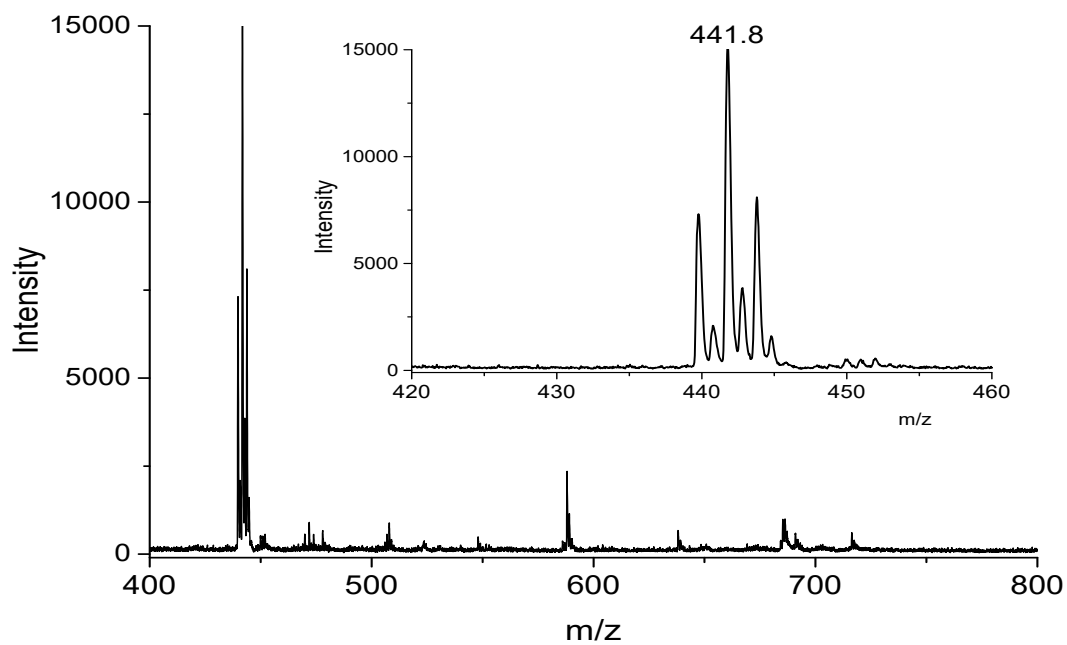

**Figure S2.**  $^1\text{H}$  NMR spectrum (top) and MALDI-TOF (bottom) (the inset: zoom in at molecular peaks) of **2**.

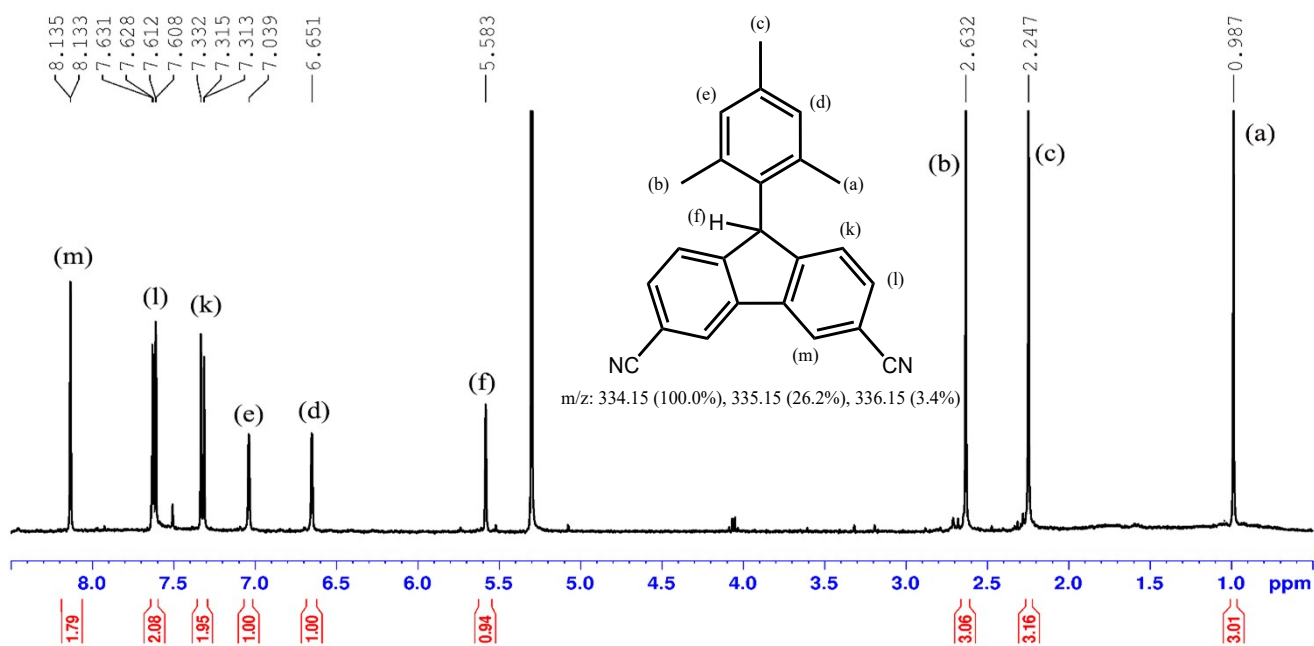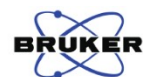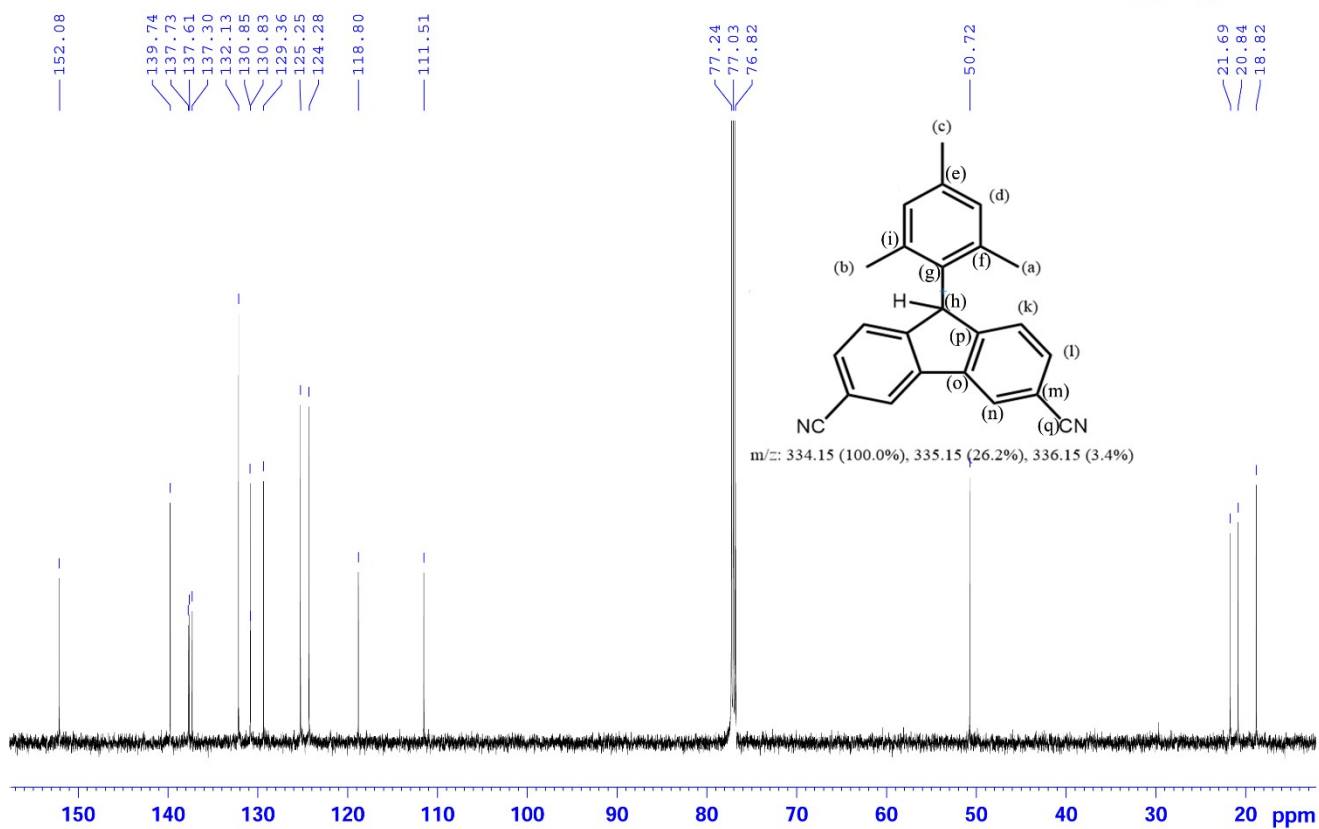

Figure S3. <sup>1</sup>H NMR spectrum (top) and <sup>13</sup>C NMR (bottom) of compound 3.

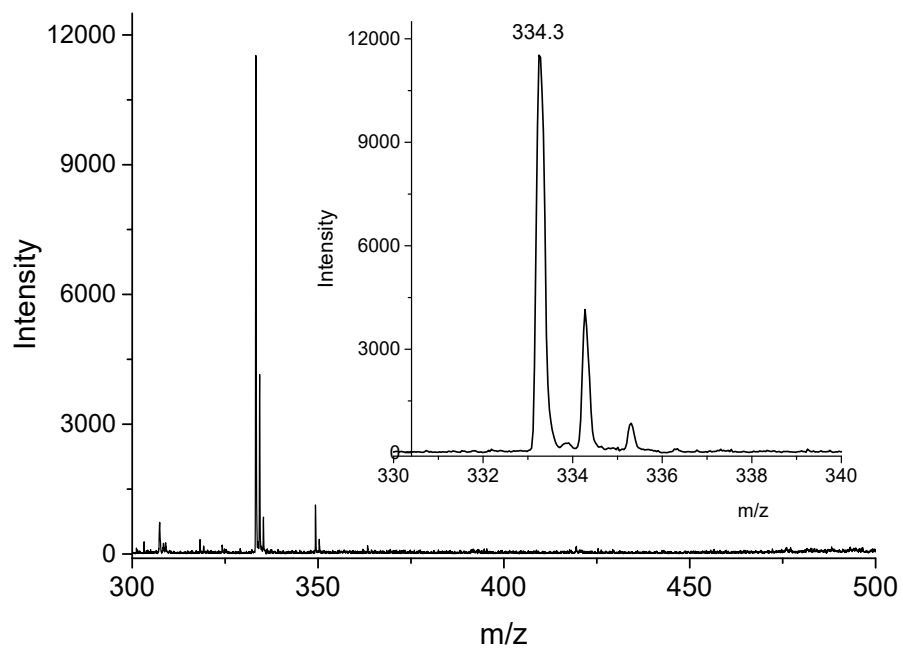

**Figure S4.** MALDI-TOF (the inset: zoom in at molecular peaks) of **3**.

## DFT calculations

Density functional theory calculations were employed with Orca 4.0 package [1,2], utilizing the B3LYP function and 6-31G basis set [9, 10] for the molecules with 21 and 45 primary fluorenyl units.

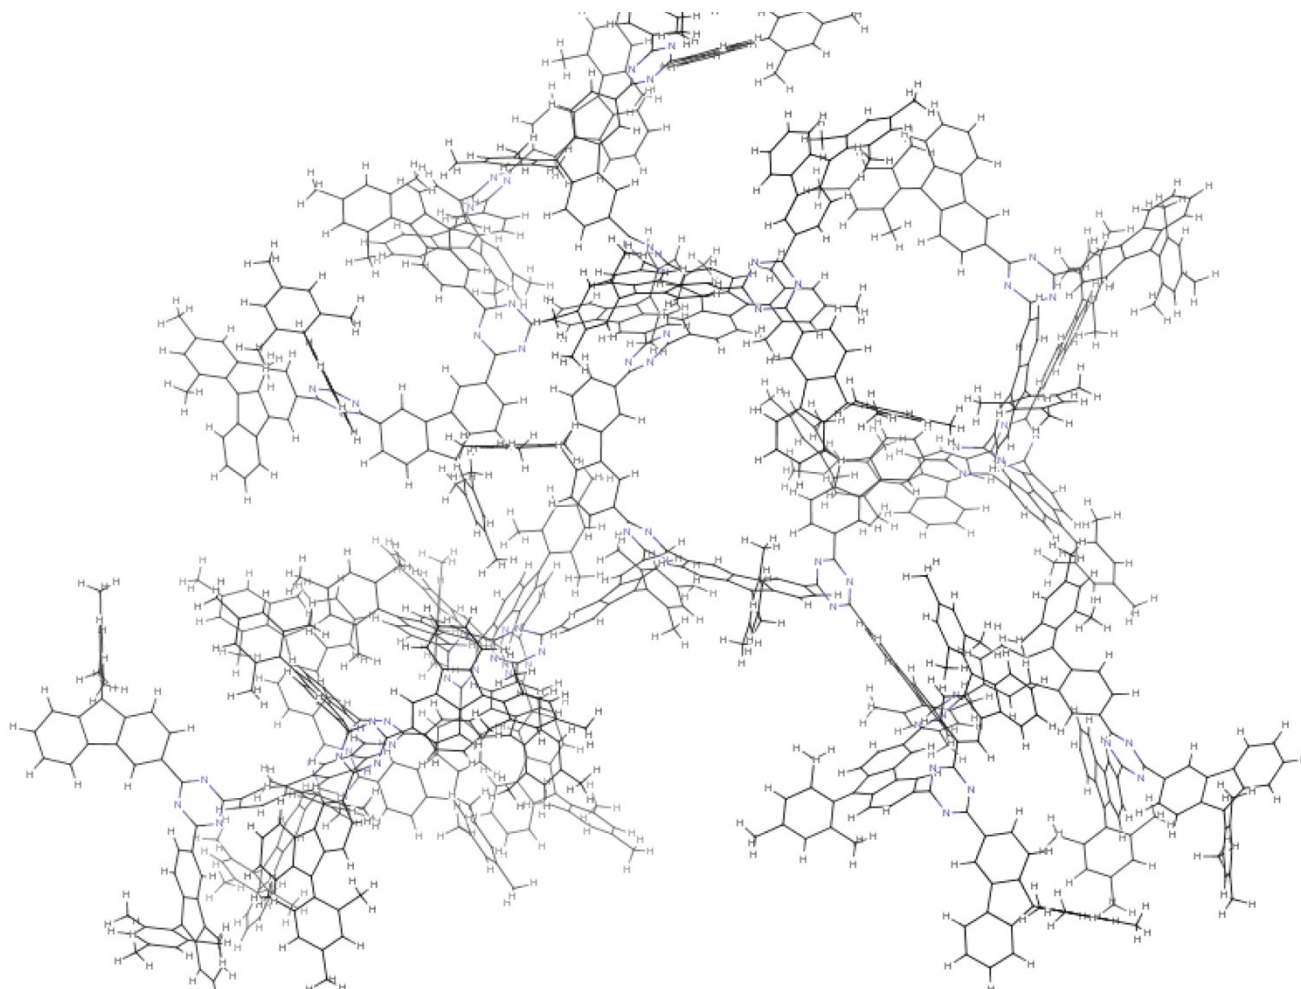

**Figure S5.** Optimized molecular structure with 45 primary units.

The singlet and triplet states of the dimer density functional theory calculations were employed with Gaussian 09 package,<sup>11</sup> utilizing the UCAM-B3LYP<sup>12-14</sup> level of theory with Pople basis set 6-31G\*<sup>15-17</sup> for all molecules in the gas phase.



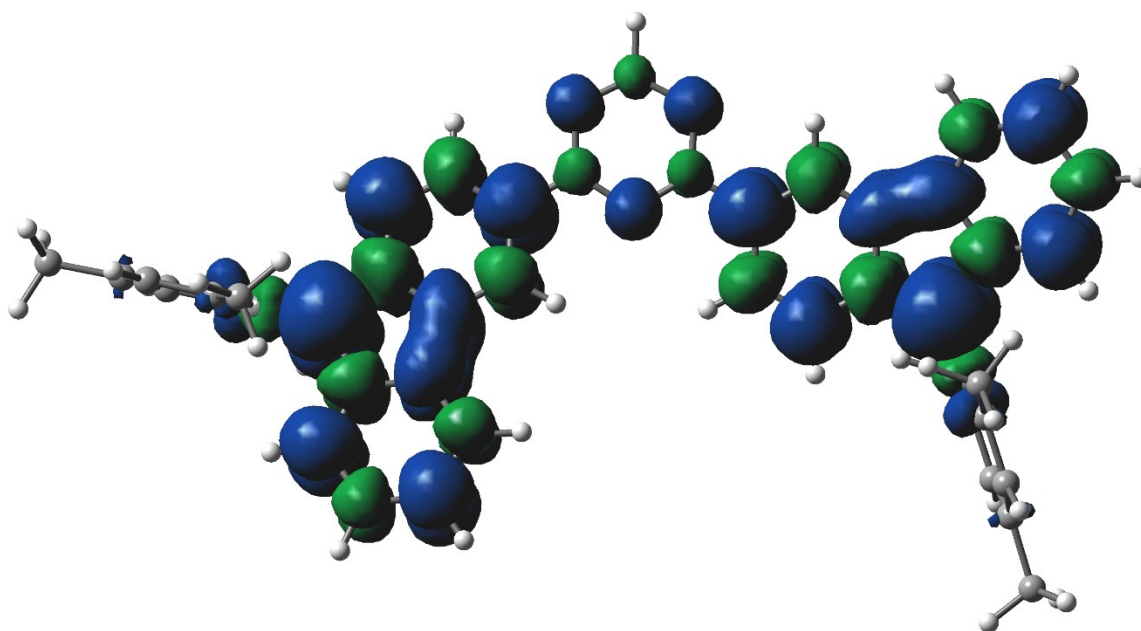

**Figure S6.** Spin density of the dimer.

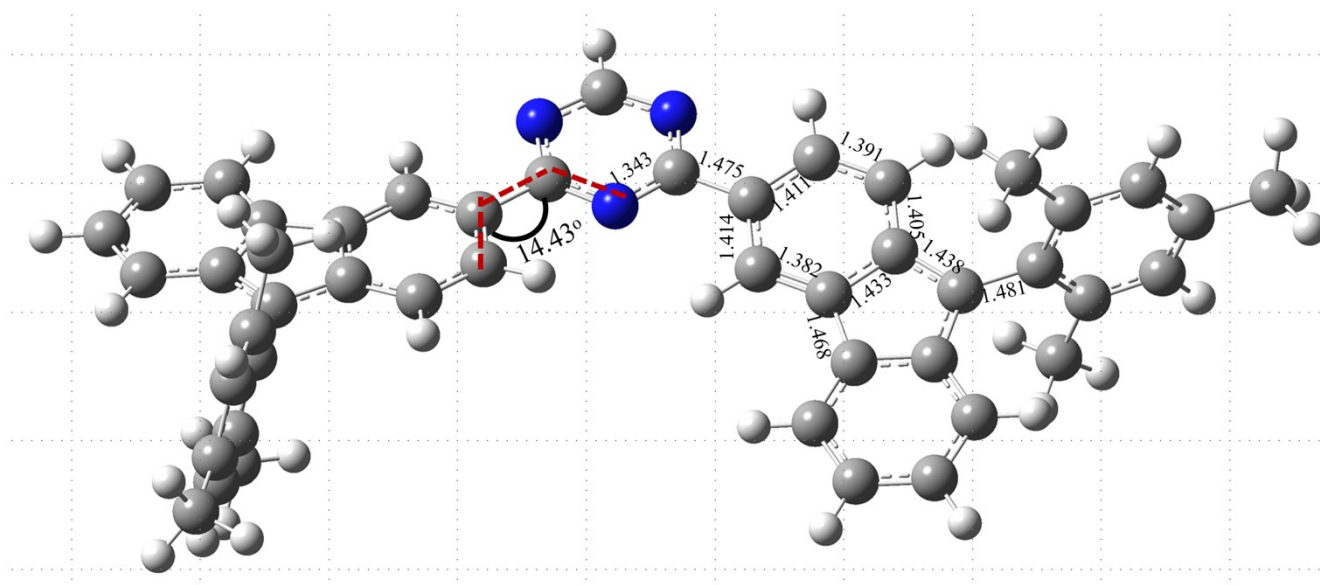

**Figure S7.** The dihedral angle between the radical and s-triazine moiety and some calculated C-C bond lengths (in Å) in the triplet ground state.

### Singlet state

```
1\1\GINC-ATLAS7-C132\SP\UB3LYP\6-31G(d,p)\C47H37N3\ROOT\12-Sep-2023\0\
\# ub3lyp/6-31g(d,p) guess=(mix,save) geom=connectivity\\fl2taz-s\\0,1
\C,0,-36.3965,33.0652,-42.4825\C,0,-35.0556,33.2377,-42.832\C,0,-34.24
```

```

52,32.1035,-42.989\C,0,-34.7939,30.7962,-42.8024\C,0,-36.1289,30.6386,
-42.4574\H,0,-37.0361,33.9343,-42.3556\H,0,-34.6436,34.2318,-42.9845\H
,0,-36.5563,29.6495,-42.3139\C,0,-32.5418,30.5795,-43.3842\C,0,-31.340
7,29.9075,-43.6654\C,0,-31.3147,28.5174,-43.6173\C,0,-33.6837,28.4495,
-43.0104\C,0,-33.7166,29.8306,-43.0495\H,0,-30.4444,30.4678,-43.9175\H
,0,-30.4007,27.9758,-43.8324\H,0,-34.5626,27.86,-42.7719\N,0,-33.6061,
25.6426,-43.2021\N,0,-32.3662,23.6101,-43.2372\C,0,-32.4703,27.7786,-4
3.2874\C,0,-36.9286,31.7817,-42.2964\C,0,-29.9461,23.6499,-43.3416\C,0
,-29.9123,22.2571,-43.5633\C,0,-28.7431,24.3629,-43.1332\C,0,-28.7052,
21.5667,-43.6056\H,0,-30.8524,21.735,-43.6995\C,0,-27.5398,23.6836,-43
.1659\H,0,-28.7946,25.4311,-42.9514\C,0,-27.5062,22.2723,-43.4118\H,0,
-28.6893,20.4944,-43.7801\C,0,-26.1527,24.1279,-42.984\C,0,-25.3154,22
.9767,-43.1223\C,0,-25.5954,25.3734,-42.7309\C,0,-23.9225,23.0998,-43.
0112\H,0,-26.222,26.2552,-42.624\C,0,-23.3751,24.3587,-42.7544\H,0,-23
.2831,22.2288,-43.128\H,0,-22.298,24.4693,-42.6641\C,0,-25.6676,20.433
7,-43.5957\C,0,-25.2743,19.646,-42.4899\C,0,-25.6119,19.8928,-44.8999\
C,0,-24.8339,18.3375,-42.7102\C,0,-25.1613,18.5801,-45.0721\C,0,-24.76
46,17.7854,-43.9929\H,0,-24.5426,17.7322,-41.8538\H,0,-25.1166,18.1697
,-46.0792\C,0,-31.9202,33.0981,-43.6384\C,0,-31.5744,33.4048,-44.9743\
C,0,-31.3793,33.8617,-42.5793\C,0,-30.698,34.4655,-45.2229\C,0,-30.504
8,34.9117,-42.8761\C,0,-30.148,35.23,-44.1897\H,0,-30.444,34.704,-46.2
541\H,0,-30.0896,35.4947,-42.0562\C,0,-25.3513,20.1878,-41.0793\H,0,-2
4.6855,21.0469,-40.9359\H,0,-26.364,20.5309,-40.8367\H,0,-25.0714,19.4
199,-40.3514\C,0,-26.0112,20.7164,-46.1047\H,0,-27.07,20.9988,-46.0727
\H,0,-25.438,21.6496,-46.1595\H,0,-25.8397,20.1597,-47.0311\C,0,-24.25
17,16.3802,-44.2071\H,0,-23.1577,16.3667,-44.3048\H,0,-24.5088,15.7268
,-43.3663\H,0,-24.6642,15.937,-45.1198\C,0,-31.7119,33.5436,-41.138\H,
0,-32.7847,33.6393,-40.9355\H,0,-31.4339,32.5141,-40.8814\H,0,-31.1791
,34.2154,-40.458\C,0,-32.1595,32.6245,-46.131\H,0,-31.8498,31.573,-46.
1115\H,0,-33.2556,32.6302,-46.1048\H,0,-31.8421,33.05,-47.088\C,0,-29.
1781,36.3512,-44.4828\H,0,-29.222,37.1307,-43.7147\H,0,-28.1432,35.984
1,-44.5146\H,0,-29.3853,36.8179,-45.452\C,0,-26.1407,21.822,-43.3877\C
,0,-32.8522,31.9833,-43.3508\C,0,-24.2002,25.4832,-42.6146\N,0,-31.232
2,25.6982,-43.3088\C,0,-32.4302,26.3038,-43.2717\C,0,-33.4946,24.3154,
-43.1923\C,0,-31.2407,24.3554,-43.2873\H,0,-37.975,31.6684,-42.0264\H,
0,-23.755,26.4543,-42.4161\H,0,-34.4235,23.7479,-43.1426\\Version=EM64
L-G09RevD.01\State=1-A\HF=-1977.6503625\S2=1.044241\S2-1=0.\S2A=0.3706
34\RMSD=9.950e-09\Dipole=0.7269851,0.4081025,-0.0560121\Quadrupole=-0.
3054271,13.9334964,-13.6280693,-8.5202531,-1.6048016,1.6899768\PG=C01
[X(C47H37N3)]\@

```

## Triplet state

```

1\1\GINC-TIGER2-C75\SP\UCAM-B3LYP\6-31G(d,p)\C47H37N3(3)\ROOT\12-Sep-2
023\0\#\ucam-b3lyp/6-31g(d,p) guess=(mix,save) geom=connectivity\fl2
taz-tCAM\0,3\C,0,-36.3965,33.0652,-42.4825\C,0,-35.0556,33.2377,-42.8
32\C,0,-34.2452,32.1035,-42.989\C,0,-34.7939,30.7962,-42.8024\C,0,-36.
1289,30.6386,-42.4574\H,0,-37.0361,33.9343,-42.3556\H,0,-34.6436,34.23
18,-42.9845\H,0,-36.5563,29.6495,-42.3139\C,0,-32.5418,30.5795,-43.384
2\C,0,-31.3407,29.9075,-43.6654\C,0,-31.3147,28.5174,-43.6173\C,0,-33.

```

6837,28.4495,-43.0104\C,0,-33.7166,29.8306,-43.0495\H,0,-30.4444,30.46  
78,-43.9175\H,0,-30.4007,27.9758,-43.8324\H,0,-34.5626,27.86,-42.7719\  
N,0,-33.6061,25.6426,-43.2021\N,0,-32.3662,23.6101,-43.2372\C,0,-32.47  
03,27.7786,-43.2874\C,0,-36.9286,31.7817,-42.2964\C,0,-29.9461,23.6499  
, -43.3416\C,0,-29.9123,22.2571,-43.5633\C,0,-28.7431,24.3629,-43.1332\  
C,0,-28.7052,21.5667,-43.6056\H,0,-30.8524,21.735,-43.6995\C,0,-27.539  
8,23.6836,-43.1659\H,0,-28.7946,25.4311,-42.9514\C,0,-27.5062,22.2723,  
-43.4118\H,0,-28.6893,20.4944,-43.7801\C,0,-26.1527,24.1279,-42.984\C,  
0,-25.3154,22.9767,-43.1223\C,0,-25.5954,25.3734,-42.7309\C,0,-23.9225  
,23.0998,-43.0112\H,0,-26.222,26.2552,-42.624\C,0,-23.3751,24.3587,-42  
.7544\H,0,-23.2831,22.2288,-43.128\H,0,-22.298,24.4693,-42.6641\C,0,-2  
5.6676,20.4337,-43.5957\C,0,-25.2743,19.646,-42.4899\C,0,-25.6119,19.8  
928,-44.8999\C,0,-24.8339,18.3375,-42.7102\C,0,-25.1613,18.5801,-45.07  
21\C,0,-24.7646,17.7854,-43.9929\H,0,-24.5426,17.7322,-41.8538\H,0,-25  
.1166,18.1697,-46.0792\C,0,-31.9202,33.0981,-43.6384\C,0,-31.5744,33.4  
048,-44.9743\C,0,-31.3793,33.8617,-42.5793\C,0,-30.698,34.4655,-45.222  
9\C,0,-30.5048,34.9117,-42.8761\C,0,-30.148,35.23,-44.1897\H,0,-30.444  
,34.704,-46.2541\H,0,-30.0896,35.4947,-42.0562\C,0,-25.3513,20.1878,-4  
1.0793\H,0,-24.6855,21.0469,-40.9359\H,0,-26.364,20.5309,-40.8367\H,0,  
-25.0714,19.4199,-40.3514\C,0,-26.0112,20.7164,-46.1047\H,0,-27.07,20.  
9988,-46.0727\H,0,-25.438,21.6496,-46.1595\H,0,-25.8397,20.1597,-47.03  
11\C,0,-24.2517,16.3802,-44.2071\H,0,-23.1577,16.3667,-44.3048\H,0,-24  
.5088,15.7268,-43.3663\H,0,-24.6642,15.937,-45.1198\C,0,-31.7119,33.54  
36,-41.138\H,0,-32.7847,33.6393,-40.9355\H,0,-31.4339,32.5141,-40.8814  
\H,0,-31.1791,34.2154,-40.458\C,0,-32.1595,32.6245,-46.131\H,0,-31.849  
8,31.573,-46.1115\H,0,-33.2556,32.6302,-46.1048\H,0,-31.8421,33.05,-47  
.088\C,0,-29.1781,36.3512,-44.4828\H,0,-29.222,37.1307,-43.7147\H,0,-2  
8.1432,35.9841,-44.5146\H,0,-29.3853,36.8179,-45.452\C,0,-26.1407,21.8  
22,-43.3877\C,0,-32.8522,31.9833,-43.3508\C,0,-24.2002,25.4832,-42.614  
6\N,0,-31.2322,25.6982,-43.3088\C,0,-32.4302,26.3038,-43.2717\C,0,-33.  
4946,24.3154,-43.1923\C,0,-31.2407,24.3554,-43.2873\H,0,-37.975,31.668  
4,-42.0264\H,0,-23.755,26.4543,-42.4161\H,0,-34.4235,23.7479,-43.1426\  
\Version=EM64L-G09RevD.01\State=3-A\HF=-1976.5136755\S2=2.110817\S2-1=  
0.\S2A=2.008686\RMSD=5.255e-09\Dipole=0.6572321,0.3457573,-0.0581457\Q  
uadrupole=-0.2405701,13.7596665,-13.5190963,-7.3792558,-1.638795,1.682  
2566\PG=C01 [X(C47H37N3)]\@

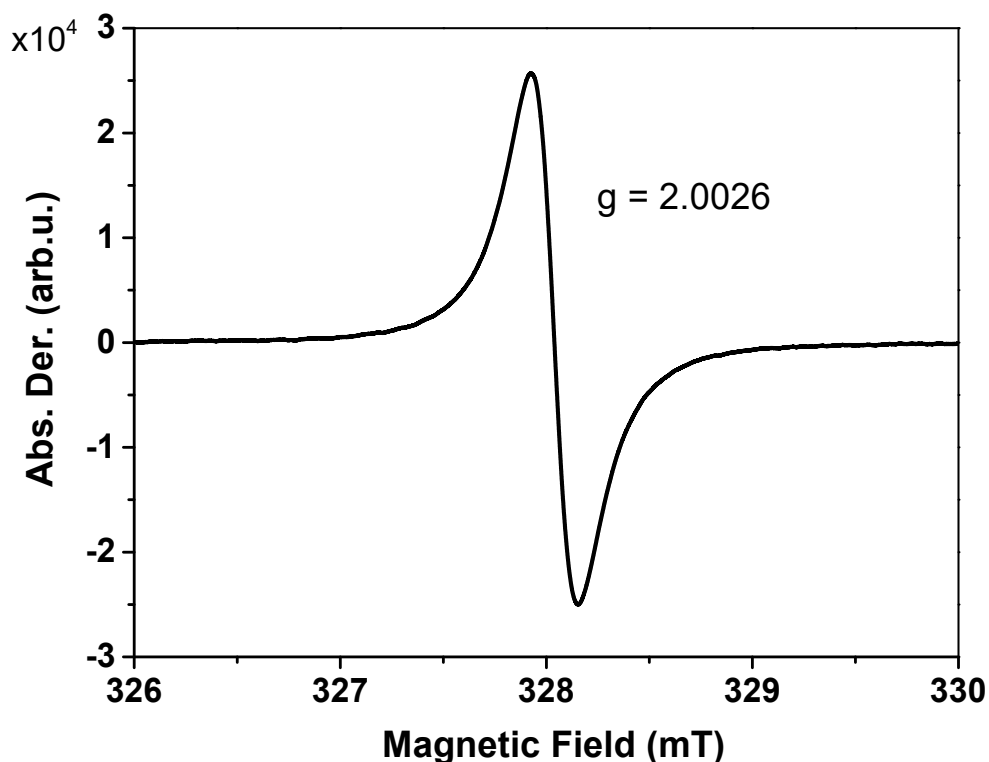

**Figure S8.** Solid state ESR spectrum of compound **7**, recorded at ambient conditions.

## References

1. F. Neese, *The ORCA program system*, *Wiley Interdiscip. Rev.: Comput. Mol. Sci.* 2012, **2**, 73-78.
2. F. Neese, *Software update: the ORCA program system, version 4.0*, *Wiley Interdiscip. Rev.: Comput. Mol. Sci.*, 2017, **8**, e1327.
3. A. D. Becke, *J. Chem. Phys.* 1993, **98**, 5648.
4. C. Lee, W. Yang, R. G. Parr, *Phys. Rev. B: Condens. Matter*, 1988, **37**, 785.
5. T. Yanai, D. Tew, and N. Handy, *Chem. Phys. Lett.* 2004, **393**, 51.
6. R. Ditchfield, W. J. Hehre, J. A. Pople, *J. Chem. Phys.* 1971, **54**, 724.
7. W. J. Hehre, R. Ditchfield, J. A. Pople, *J. Chem. Phys.* 1972, **56**, 2257.
8. P. C. Hariharan, J. A. Pople, *Theor. Chim. Acta*, 1973, **28**, 213.
9. F. Weigend and R. Ahlrichs, *Phys. Chem. Chem. Phys.* **2005**, **7**, 3297.
10. F. Weigend, *Phys. Chem. Chem. Phys.* 2006, **8**, 1057.
11. *Gaussian 09; Revision A.2*; Frisch, M. J.; Trucks, G. W.; Schlegel, H. B.; Scuseria, G. E.; Robb, M. A.; Cheeseman, J. R.; Scalmani, G.; Barone, V.; Mennucci, B.; Petersson, G. A.; Nakatsuji, H.; Caricato, M.; Li, X.; Hratchian, H. P.; Izmaylov, A. F.; Bloino, J.; Zheng, G.; Sonnenberg, J. L.; Hada, M.; Ehara, M.; Toyota, K.; Fukuda, R.; Hasegawa, J.; Ishida, M.; Nakajima, T.; Honda, Y.; Kitao, O.; Nakai, H.; Vreven, T.; Montgomery, J., J. A.; Peralta, J. E.; Ogliaro, F.; Bearpark, M.; Heyd, J. J.; Brothers, E.; Kudin, K. N.; Staroverov, V. N.;

Kobayashi, R.; Normand, J.; Raghavachari, K.; Rendell, A.; Burant, J. C.; Iyengar, S. S.; Tomasi, J.; Cossi, M.; Rega, N.; Millam, N. J.; Klene, M.; Knox, J. E.; Cross, J. B.; Bakken, V.; Adamo, C.; Jaramillo, J.; Gomperts, R.; Stratmann, R. E.; Yazyev, O.; Austin, A. J.; Cammi, R.; Pomelli, C.; Ochterski, J. W.; Martin, R. L.; Morokuma, K.; Zakrzewski, V. G.; Voth, G. A.; Salvador, P.; Dannenberg, J. J.; Dapprich, S.; Daniels, A. D.; Farkas, Ö.; Foresman, J. B.; Ortiz, J. V.; Cioslowski, J.; Fox, D. J.; Gaussian, Inc., Wallingford CT, 2009.

12. A. D. Becke, *J. Chem. Phys.* 1993, **98**, 5648.

13. C. Lee, W. Yang, R. G. Parr, *Phys. Rev. B: Condens. Matter*, 1988, **37**, 785.

14. T. Yanai, D. Tew, and N. Handy, *Chem. Phys. Lett.* 2004, **393**, 51.

15. R. Ditchfield, W. J. Hehre, J. A. Pople, *J. Chem. Phys.* 1971, **54**, 724.

16. W. J. Hehre, R. Ditchfield, J. A. Pople, *J. Chem. Phys.* 1972, **56**, 2257.

17. P. C. Hariharan, J. A. Pople, *Theor. Chim. Acta*, 1973, **28**, 213.
